# Supplementary material for: MarRA, SoxSR, and Rob encode a signal dependent regulatory network in Escherichia coli
Source: Royal Society of Chemistry journal article supplement (doi:10.1039/c6mb00263c), 2016-04-08
Supplement: c6mb00263c1.pdf [file c6mb00263c1.pdf]

## Supplement Figure S1

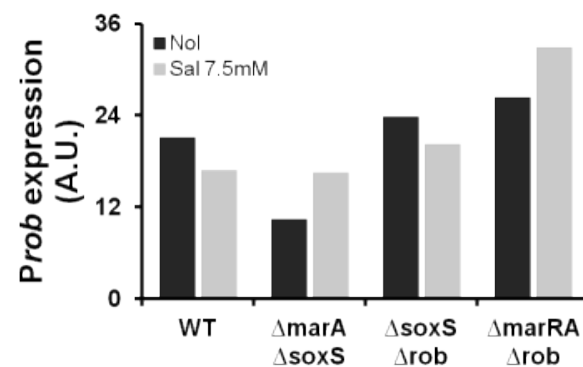

**Figure S1. End-point expression (A.U.) of *Prob* in presence of salicylate.** X-axis represents wild-type as compared with various genetic backgrounds and Y-axis represents fluorescence in uninduced and salicylate induced condition. In wild-type,  $\Delta marA$   $\Delta soxS$ ,  $\Delta soxS$   $\Delta rob$ , and  $\Delta marRA$   $\Delta rob$

## Supplement Figure S2

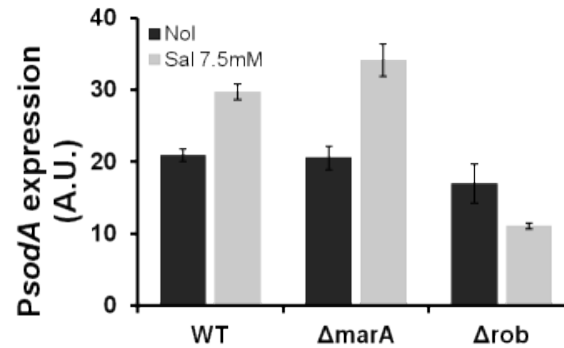

**Figure S2. End-point expression (A.U.) of *PsodA* in presence of salicylate.** X-axis represents wild-type as compared with  $\Delta marA$ , and  $\Delta rob$  genetic backgrounds and Y-axis represents fluorescence in uninduced and salicylate induced condition. Fluorescence values were normalized with optimal density at 600nm to count for cell density.
